# Supplementary material for: Novel fast and easy growth of highly crystalline, idiomorphic fluorapatite crystals via an atmospheric pressure plasma-assisted flux coating method
Source: Royal Society of Chemistry journal article supplement (doi:10.1039/c0ce00405g), 2011-01-01
Supplement: c0ce00405g.pdf [file c0ce00405g.pdf]

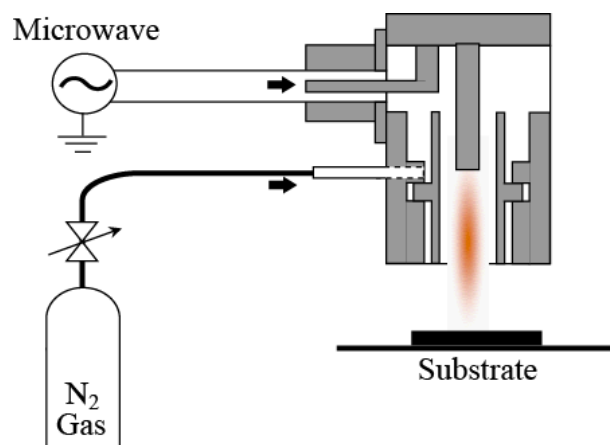

5 ESI. 1 Scheme of N<sub>2</sub> atmospheric pressure plasma jet.

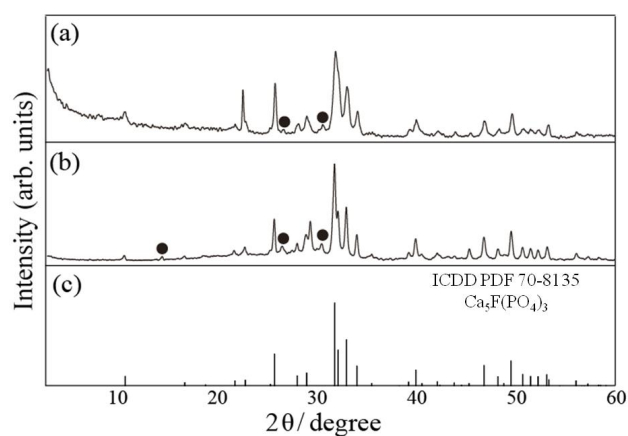

15 ESI. 3 XRD patterns (CuK $\alpha$ ) of FAp crystals grown at (a) short time irradiation (solute concentration = 15 mol%) and (b) low solute concentration of 1 mol% (irradiation time = 10 s), respectively, and (c) Ca<sub>5</sub>F(PO<sub>4</sub>)<sub>3</sub> ICDD PDF.

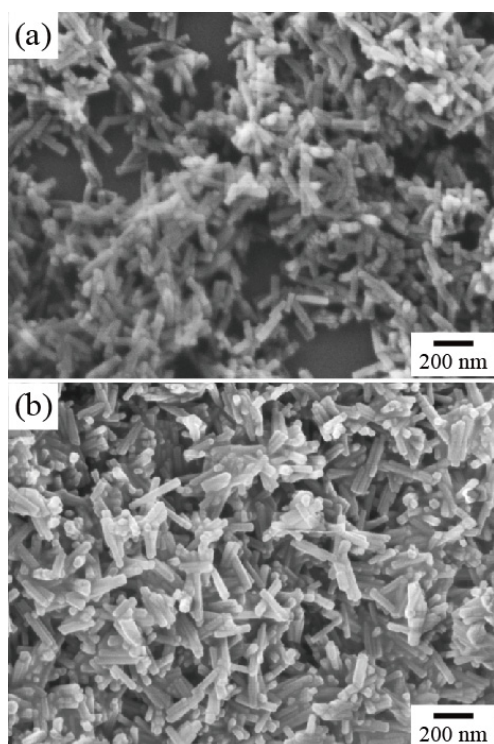

10 ESI. 2 FESEM images of the FAp crystals grown at (a) short time irradiation of 1s (solute concentration = 15 mol%) and (b) low solute concentration of 1 mol% (irradiation time = 10 s), respectively.

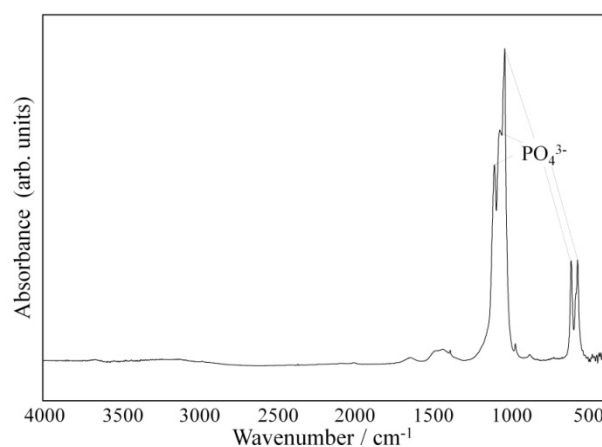

20 ESI. 4 FTIR spectrum of well-developed, 1-D FAp crystals grown on the Si substrate through atmospheric pressure plasma-assisted flux coating method.

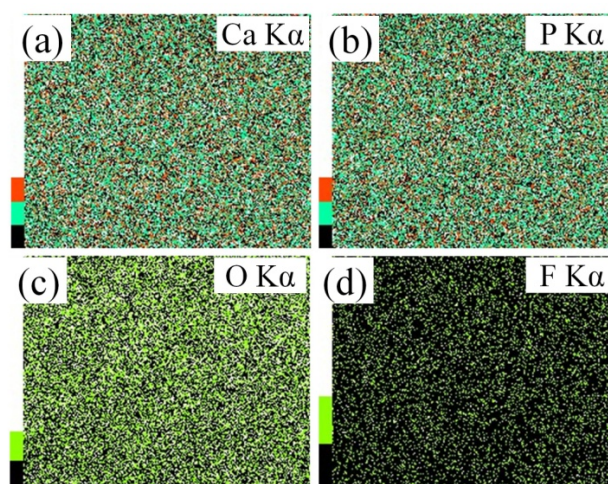

25 ESI. 5 EDS mapping images of FAp crystals grown on the Si substrate.
